# Supplementary material for: Production and monitoring of biomass and fucoxanthin with brown microalgae under outdoor conditions
Source: PubMed Central journal article supplement (PMC7986402; doi:10.1002/bit.27657), 2020-12-31
Supplement: BIT-118-1355-s001.pdf [file BIT-118-1355-s001.pdf]

**Production and monitoring of biomass and fucoxanthin with brown microalgae under outdoor conditions**

Fengzheng Gao<sup>1,\*,#</sup>, Marta Sá<sup>1,#</sup>, Iago Teles (Cabanelas, ITD)<sup>1</sup>, René H. Wijffels<sup>1,2</sup>, Maria J. Barbosa<sup>1</sup>

1 Wageningen University, Bioprocess Engineering, AlgaePARC, P.O. Box 16, 6700 AA, Wageningen, Netherlands

2 Faculty Biosciences and Aquaculture, Nord University, N-8049 Bodø, Norway

\* Corresponding author at: Wageningen University, Bioprocess Engineering, AlgaePARC, P.O. Box 16, 6700 AA, Wageningen, Netherlands

Fengzheng Gao, E-mail addresses: fengzheng.gao@wur.nl; gaofengzheng@outlook.com; Tel: +31317483595

# These authors contributed equally to this work.

## Supporting information

a) *Tisochrysis lutea*

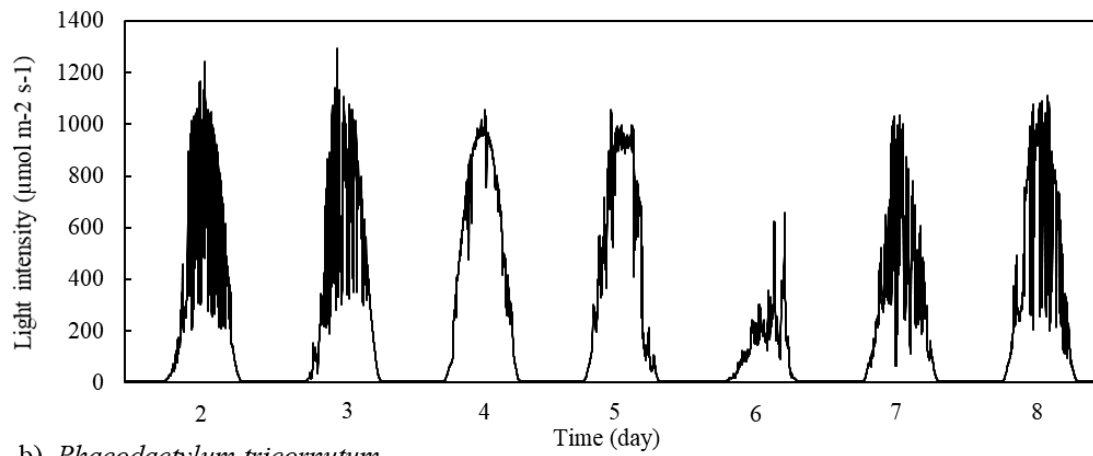

b) *Phaeodactylum tricornutum*

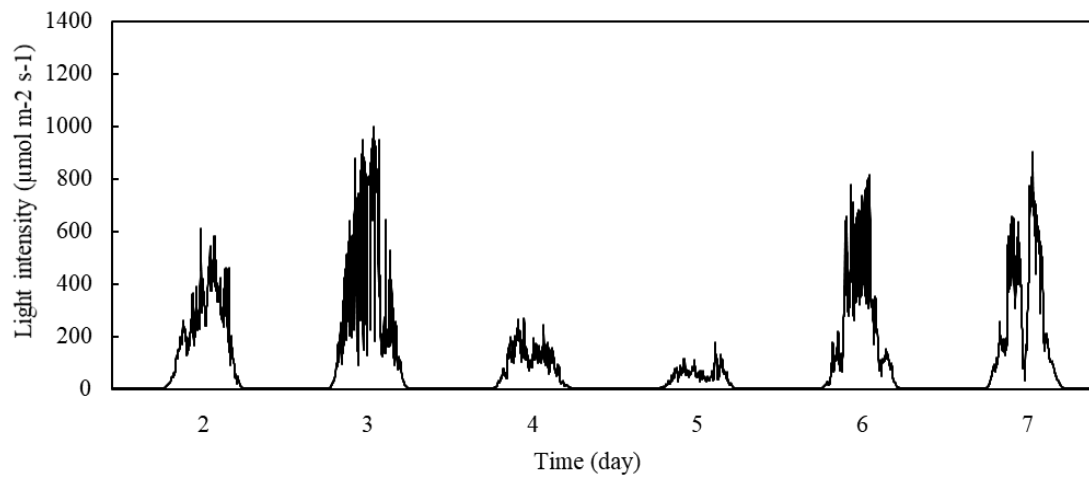

**FIGURE S1** Real-time light intensity during the cultivation of *Tisochrysis lutea* (a) and *Phaeodactylum tricornutum* (b). Note: Light intensity was recorded each minute.

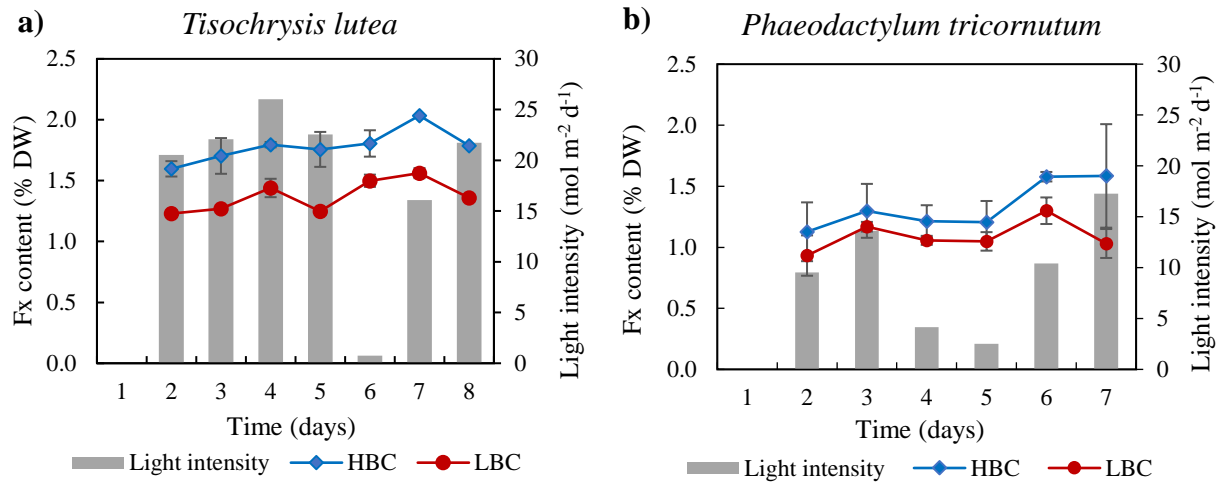

**FIGURE S2** Fucoxanthin content (% DW) of *Tisochrysis lutea* (a) and *Phaeodactylum tricornutum* (b). Two cell concentrations were studied: low biomass concentration (LBC) of 0.4 g L<sup>-1</sup> DW (diamond, blue), and high biomass concentration (HBC) of 1.1 g L<sup>-1</sup> DW (circles, red)
